# Supplementary material for: Synthesis, crystal structures and reversible solid-state crystal-to-crystal transformation of three isostructural lead(ii) halide coordination polymers with different luminescence properties in bulk and nanoscale
Source: Royal Society of Chemistry journal article supplement (doi:10.1039/d1ce01509e), 2021-12-14
Supplement: d1ce01509e1.pdf [file d1ce01509e1.pdf]

## Synthesis, Crystal Structure and Reversible Solid-State Crystal-to-Crystal Transformation of Three Isostructural Lead(II) Halide Coordination Polymers with different luminescence properties in bulk and nano scale

Leila Aboutorabi, Ali Morsali\*

Department of Chemistry, Faculty of Basic Sciences, Tarbiat Modares University, Tehran, P.O. Box 14115-175, Iran

Email: Morsali\_a@modares.ac.ir, Morsali\_a@yahoo.com

**Table S1.** Selective Bond Lengths (Å) and Angles (deg) for Complexes 1-3.

| 1                    |            | 2                    |            | 3                   |            |
|----------------------|------------|----------------------|------------|---------------------|------------|
| Pb(1)-O(3)           | 2.508(4)   | Pb(1)-O(3)#1         | 2.518(3)   | Pb(1)-O(2)          | 2.527(3)   |
| Pb(1)-O(3)#1         | 2.587(4)   | Pb(1)-O(1)           | 2.566(3)   | Pb(1)-O(1)#1        | 2.565(3)   |
| Pb(1)-O(2)           | 2.592(4)   | Pb(1)-O(3)           | 2.588(3)   | Pb(1)-O(1)#2        | 2.617(3)   |
| Pb(1)-O(1)#2         | 2.604(4)   | Pb(1)-O(2)           | 2.631(3)   | Pb(1)-O(3)#3        | 2.687(3)   |
| Pb(1)-O(1)           | 2.724(5)   | Pb(1)-O(2)#2         | 2.706(3)   | Pb(1)-O(3)          | 2.724(3)   |
| Pb(1)-Cl(1)#3        | 2.8388(19) | Pb(1)-Br(1)          | 2.9771(5)  | Pb(1)-I(1)          | 3.1654(4)  |
| Pb(1)-Cl(1)          | 2.9503(17) | Pb(1)-Br(1)#3        | 3.1067(5)  | Pb(1)-I(1)#4        | 3.3132(3)  |
| O(3)-Pb(1)-O(3)#1    | 92.53(9)   | O(3)#1-Pb(1)-O(1)    | 72.95(9)   | O(2)-Pb(1)-O(1)#1   | 72.43(11)  |
| O(3)-Pb(1)-O(2)      | 73.17(14)  | O(3)#1-Pb(1)-O(3)    | 89.32(6)   | O(2)-Pb(1)-O(1)#2   | 80.68(11)  |
| O(3)#1-Pb(1)-O(2)    | 76.79(14)  | O(1)-Pb(1)-O(3)      | 78.56(10)  | O(1)#1-Pb(1)-O(1)#2 | 84.35(6)   |
| O(3)-Pb(1)-O(1)#2    | 157.77(13) | O(3)#1-Pb(1)-O(2)    | 156.94(9)  | O(2)-Pb(1)-O(3)#3   | 117.35(10) |
| O(3)#1-Pb(1)-O(1)#2  | 108.75(14) | O(1)-Pb(1)-O(2)      | 117.01(10) | O(1)#1-Pb(1)-O(3)#3 | 154.93(10) |
| O(2)-Pb(1)-O(1)#2    | 117.10(14) | O(3)-Pb(1)-O(2)      | 112.57(10) | O(1)#2-Pb(1)-O(3)#3 | 119.14(11) |
| O(3)-Pb(1)-O(1)      | 121.62(13) | O(3)#1-Pb(1)-O(2)#2  | 121.80(9)  | O(2)-Pb(1)-O(3)     | 49.47(10)  |
| O(3)#1-Pb(1)-O(1)    | 82.16(13)  | O(1)-Pb(1)-O(2)#2    | 49.33(9)   | O(1)#1-Pb(1)-O(3)   | 121.29(10) |
| O(2)-Pb(1)-O(1)      | 48.91(14)  | O(3)-Pb(1)-O(2)#2    | 86.43(9)   | O(1)#2-Pb(1)-O(3)   | 92.99(10)  |
| O(1)#2-Pb(1)-O(1)    | 69.32(15)  | O(2)-Pb(1)-O(2)#2    | 69.00(10)  | O(3)#3-Pb(1)-O(3)   | 69.48(11)  |
| O(3)-Pb(1)-Cl(1)#3   | 74.63(10)  | O(3)#1-Pb(1)-Br(1)   | 75.73(6)   | O(2)-Pb(1)-I(1)     | 105.30(9)  |
| O(3)#1-Pb(1)-Cl(1)#3 | 164.14(10) | O(1)-Pb(1)-Br(1)     | 106.74(8)  | O(1)#1-Pb(1)-I(1)   | 77.04(7)   |
| O(2)-Pb(1)-Cl(1)#3   | 107.43(12) | O(3)-Pb(1)-Br(1)     | 161.44(6)  | O(1)#2-Pb(1)-I(1)   | 157.40(7)  |
| O(1)#2-Pb(1)-Cl(1)#3 | 83.30(11)  | O(2)-Pb(1)-Br(1)     | 81.36(7)   | O(3)#3-Pb(1)-I(1)   | 78.05(8)   |
| O(1)-Pb(1)-Cl(1)#3   | 112.35(10) | O(2)#2-Pb(1)-Br(1)   | 110.69(7)  | O(3)-Pb(1)-I(1)     | 107.54(7)  |
| O(3)-Pb(1)-Cl(1)     | 82.63(11)  | O(3)#1-Pb(1)-Br(1)#3 | 81.11(7)   | O(2)-Pb(1)-I(1)#4   | 142.90(8)  |
| O(3)#1-Pb(1)-Cl(1)   | 71.59(9)   | O(1)-Pb(1)-Br(1)#3   | 141.05(8)  | O(1)#1-Pb(1)-I(1)#4 | 78.66(7)   |
| O(2)-Pb(1)-Cl(1)     | 138.94(12) | O(3)-Pb(1)-Br(1)#3   | 72.48(6)   | O(1)#2-Pb(1)-I(1)#4 | 73.70(6)   |
| O(1)#2-Pb(1)-Cl(1)   | 97.71(10)  | O(2)-Pb(1)-Br(1)#3   | 98.13(7)   | O(3)#3-Pb(1)-I(1)#4 | 98.63(7)   |
| O(1)-Pb(1)-Cl(1)     | 145.33(11) | O(2)#2-Pb(1)-Br(1)#3 | 149.16(7)  | O(3)-Pb(1)-I(1)#4   | 155.45(8)  |
| Cl(1)#3-Pb(1)-Cl(1)  | 97.11(5)   | Br(1)-Pb(1)-Br(1)#3  | 94.037(14) | I(1)-Pb(1)-I(1)#4   | 89.996(9)  |

Symmetry transformations used to generate equivalent atoms: **1:** #1 -x+3/2,y+1/2,z #2 -x+1,y,-z+3/2 #3 -x+3/2,y-1/2,z; **2:** #1 -x+3/2,y-1/2,z #2 -x+2,y,-z+1/2 #3 -x+3/2,y+1/2,z; **3:** #1 x+1/2,-y+1/2,-z+1 #2 -x+2,-y+1,-z+1 #3 -x+2,y,-z+3/2 #4 -x+5/2,y+1/2,z

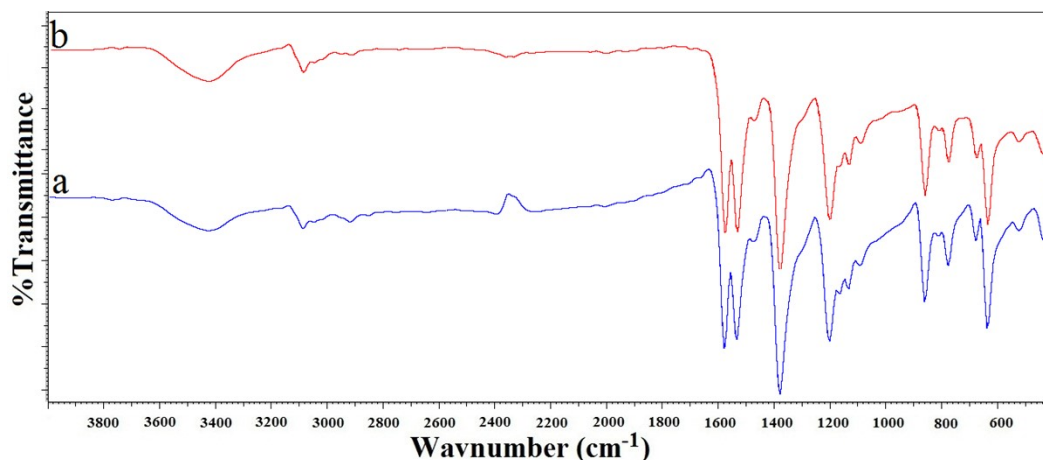

(c)

Single crystal of **1**: m.p. > 300 °C; yield 61% based on Pb(II); C<sub>6</sub>H<sub>4</sub>ClNO<sub>3</sub>Pb: calcd. C, 18.93; H, 1.06; N, 3.67%; found: C, 18.86; H, 1.10; N, 3.58%. FT-IR (KBr cm<sup>-1</sup>): 679 cm<sup>-1</sup> (s, ν (Pb–O)), 778 cm<sup>-1</sup> (m, ν<sub>oop</sub> (C–H)<sub>ring</sub>), 862 cm<sup>-1</sup> (s, ν (C–C)), 1136 cm<sup>-1</sup> (m, ν (C–H)<sub>ring</sub>), 1205 cm<sup>-1</sup> (vs, ν (N–O)<sub>N-oxide</sub>), 1382 cm<sup>-1</sup> (m, ν (C=C)<sub>Ar</sub>), 1537 cm<sup>-1</sup> (vs, ν<sub>sym</sub> (CO<sub>2</sub>–Pb)), 1580 cm<sup>-1</sup> (s, ν<sub>asym</sub> (CO<sub>2</sub>–Pb)), 3092 cm<sup>-1</sup> (w, ν<sub>sym</sub> (C–H)).

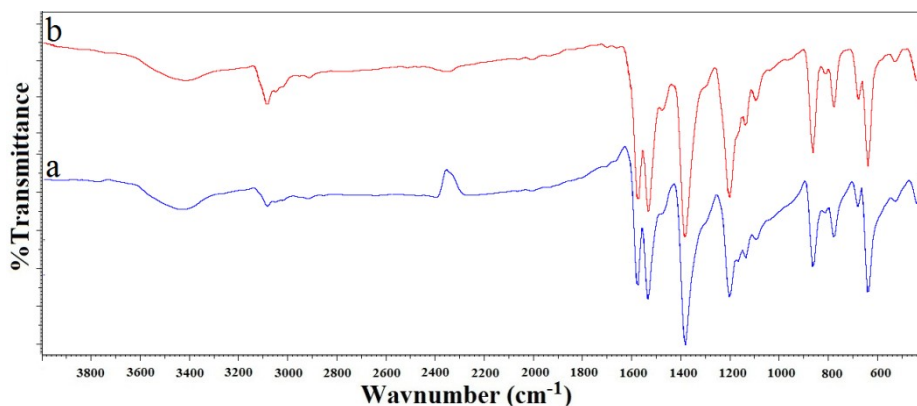

(d)

Single crystal of **2**: m.p. > 300 °C; yield 73% based on Pb(II); C<sub>6</sub>H<sub>4</sub>BrNO<sub>3</sub>Pb: calcd. C, 16.95; H, 0.95; N, 3.29%; found: C, 16.87; H, 1.10; N, 3.18%. FT-IR (KBr cm<sup>-1</sup>): 678 cm<sup>-1</sup> (s, ν (Pb–O)), 776 cm<sup>-1</sup> (m, ν<sub>oop</sub> (C–H)<sub>ring</sub>), 861 cm<sup>-1</sup> (s, ν (C–C)), 1135 cm<sup>-1</sup> (m, ν (C–H)<sub>ring</sub>), 1201 cm<sup>-1</sup> (vs, ν

(N–O)<sub>N-oxide</sub>), 1382 cm<sup>-1</sup> (m,  $\nu$  (C=C)<sub>Ar</sub>), 1533 cm<sup>-1</sup> (vs,  $\nu_{\text{sym}}$  (CO<sub>2</sub>–Pb)), 1577 cm<sup>-1</sup> (s,  $\nu_{\text{asym}}$  (CO<sub>2</sub>–Pb)), 3085 cm<sup>-1</sup> (w,  $\nu_{\text{sym}}$  (C–H)).

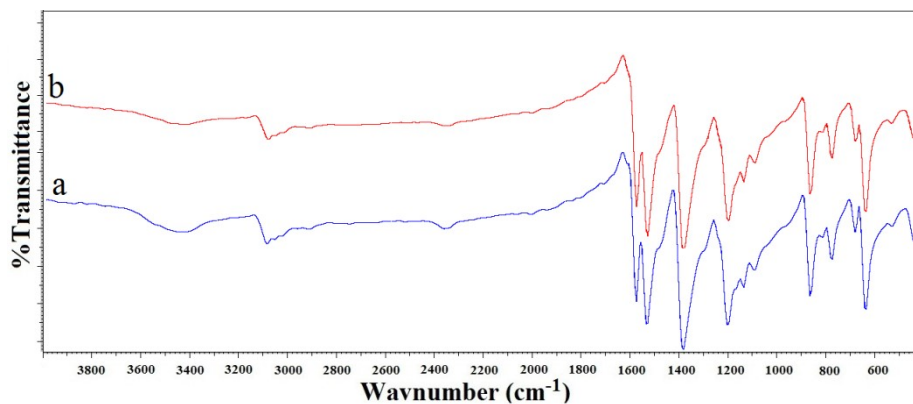

(e)

Single crystal of **3**: m.p. > 300 °C; Yield 80% based on Pb(II); C<sub>6</sub> H<sub>4</sub> I N O<sub>3</sub> Pb: calcd. C, 15.26; H, 0.85; N, 2.97%; found: C, 15.17; H, 1.01; N, 3.07%. FT-IR (KBr cm<sup>-1</sup>): 678 cm<sup>-1</sup> (s,  $\nu$  (Pb–O)), 774 cm<sup>-1</sup> (m,  $\nu_{\text{oop}}$  (C–H)<sub>ring</sub>), 861 cm<sup>-1</sup> (s,  $\nu$  (C–C)), 1135 cm<sup>-1</sup> (m,  $\nu$  (C–H)<sub>ring</sub>), 1200 cm<sup>-1</sup> (vs,  $\nu$  (N–O)<sub>N-oxide</sub>), 1382 cm<sup>-1</sup> (m,  $\nu$  (C=C)<sub>Ar</sub>), 1531 cm<sup>-1</sup> (vs,  $\nu_{\text{sym}}$  (CO<sub>2</sub>–Pb)), 1574 cm<sup>-1</sup> (s,  $\nu_{\text{asym}}$  (CO<sub>2</sub>–Pb)), 3085 cm<sup>-1</sup> (w,  $\nu_{\text{sym}}$  (C–H)).

**Figure S1:** The IR spectrum of compound **1-3** (c-e): a) single-crystal synthesized by branched-tube method, b) nano structures synthesized by sonochemical method.

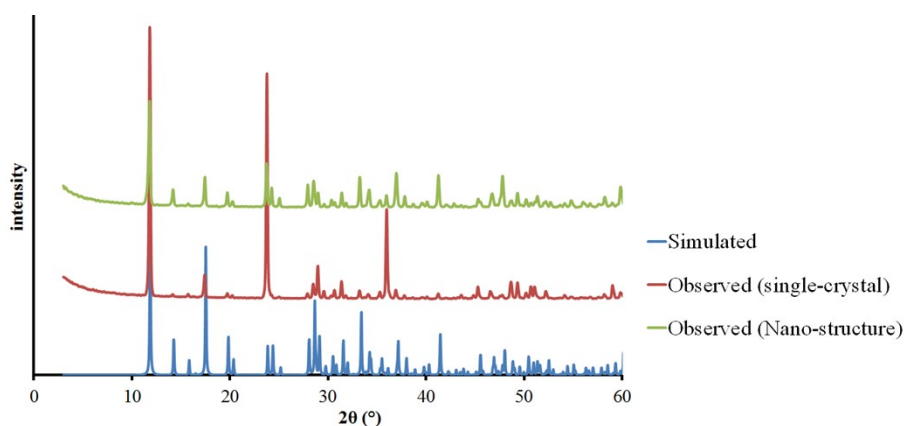

(a)

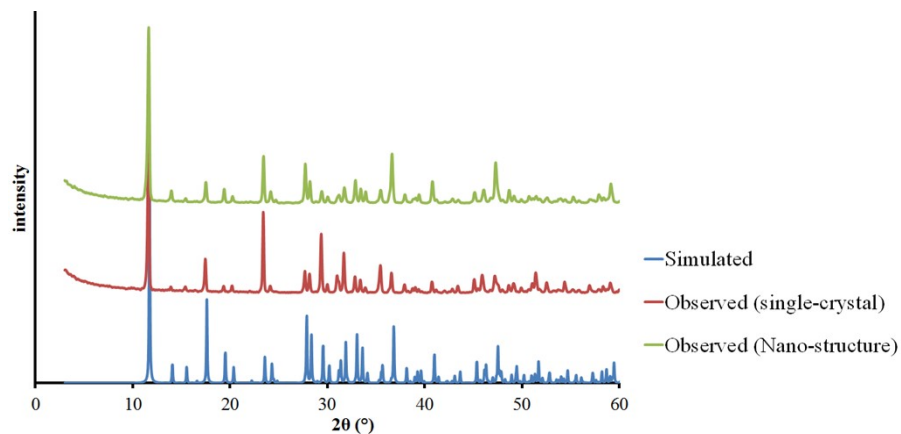

(b)

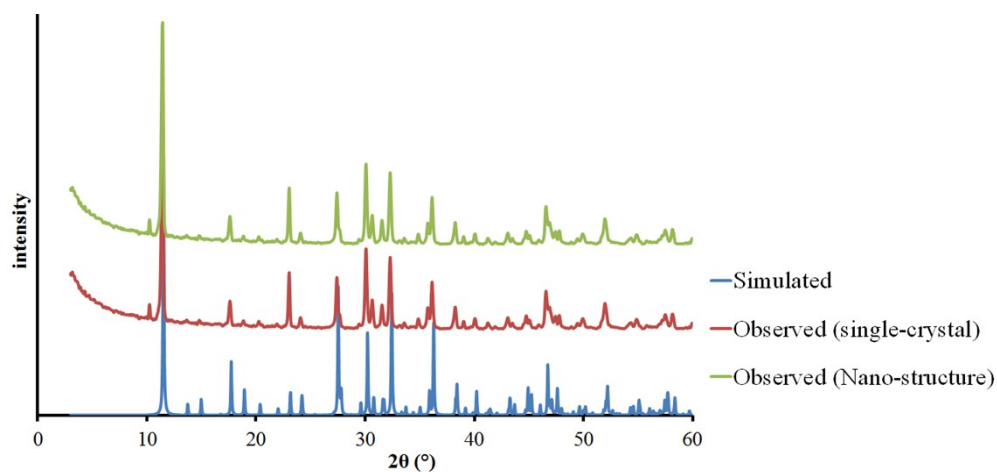

(c)

**Figure S2.** Experimental and simulated powder X-ray diffraction (PXRD) patterns for compounds 1-3 (a-c).

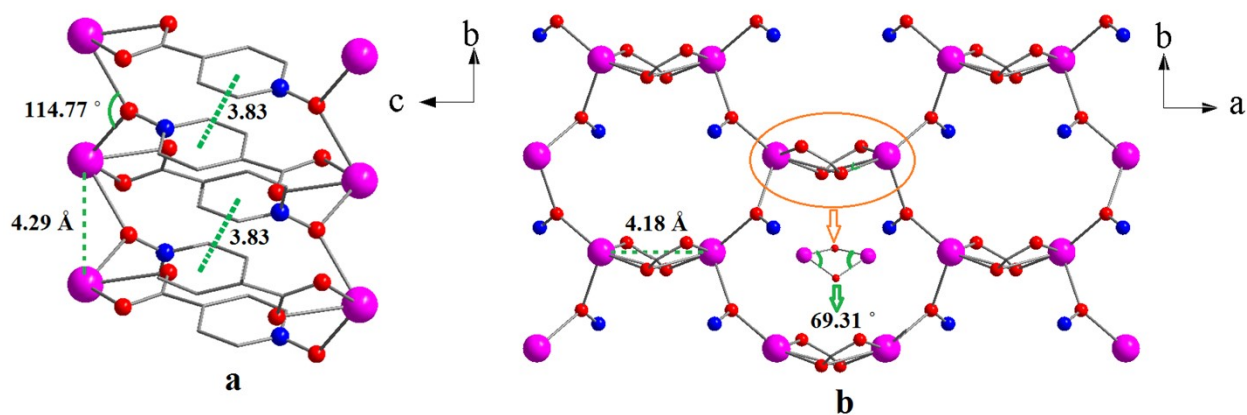

**Figure S3.** View of distances and angles of compound 1: a) 1D zigzag chain and the  $\pi$ - $\pi$  interactions; b)  $[\text{Pb}_2\text{O}_2]$  unit; (Cl ions and H atoms are omitted for clarity).

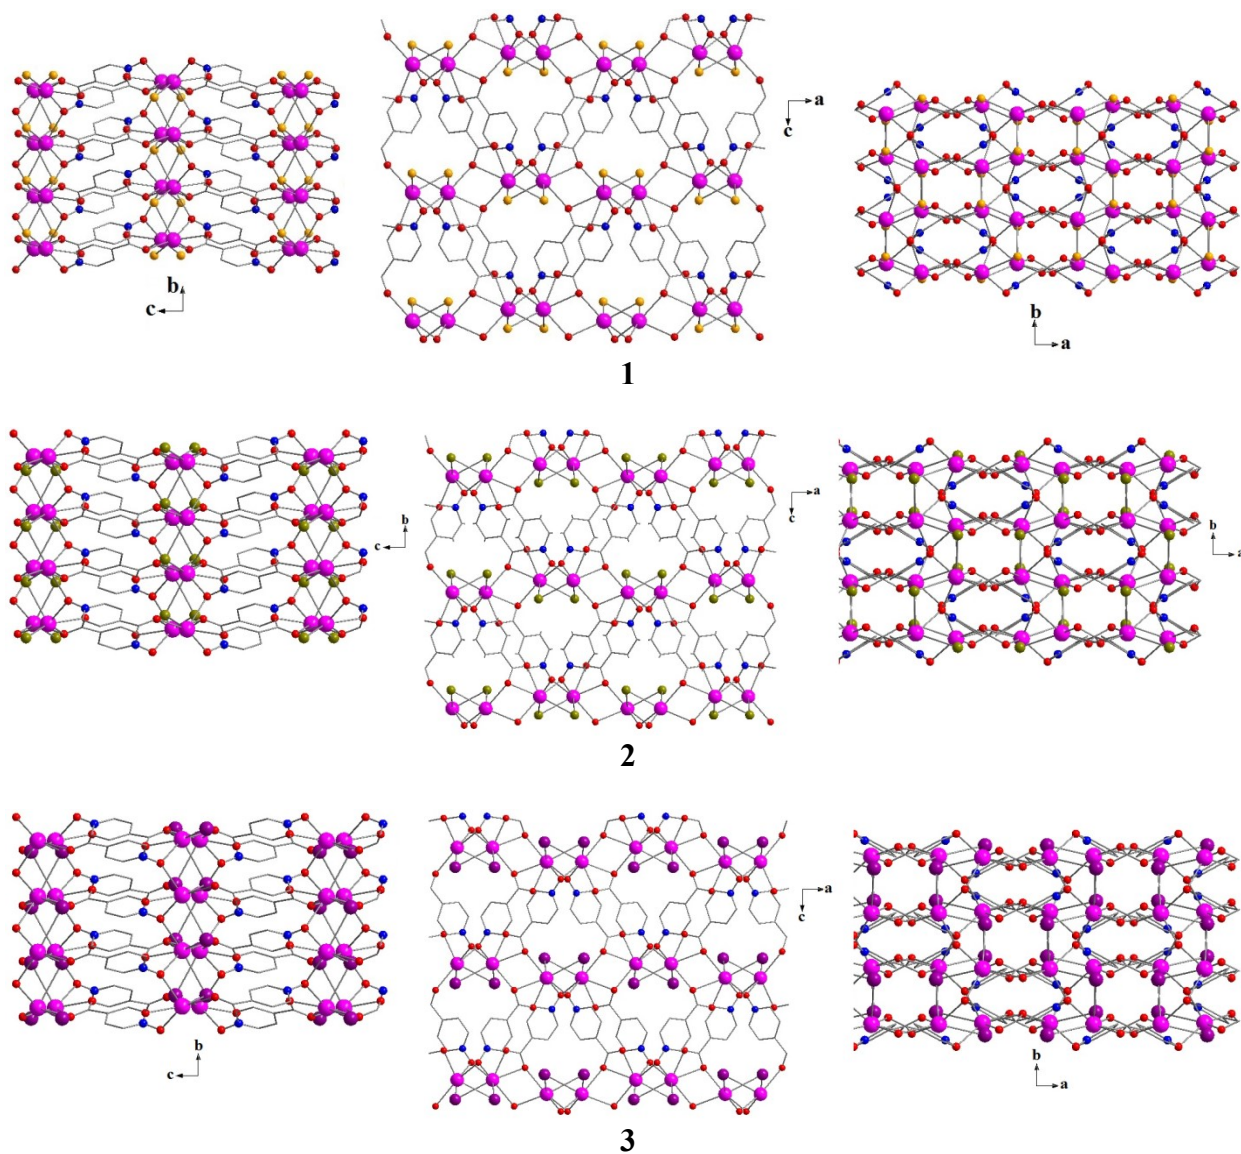

**Figure S4.** Crystal packing of isostructural 3D CPs **1-3** along *a*, *b* and *c* directions, Color code: pink, Pb; red, O; blue, N; gray, C; yellow, Cl; green, Br and violet, I atoms.

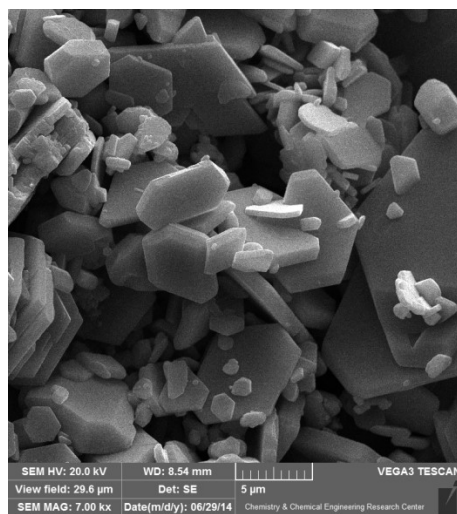

(1)

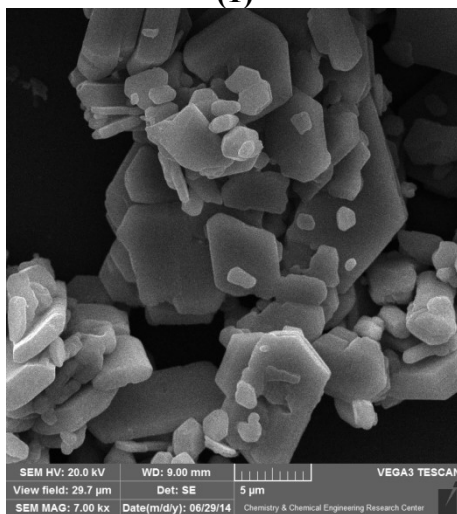

(2)

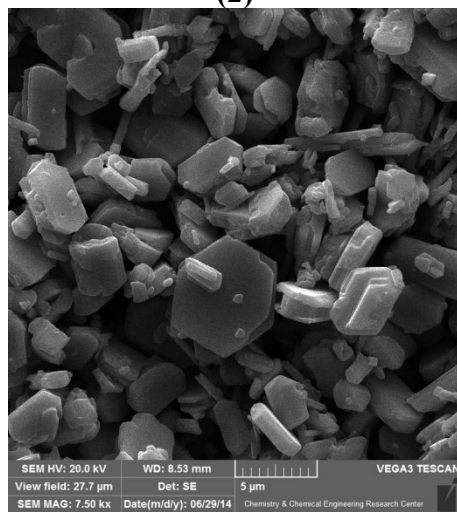

(3)

**Figure S5.** SEM images of the synthesized compounds by sonochemical methods.

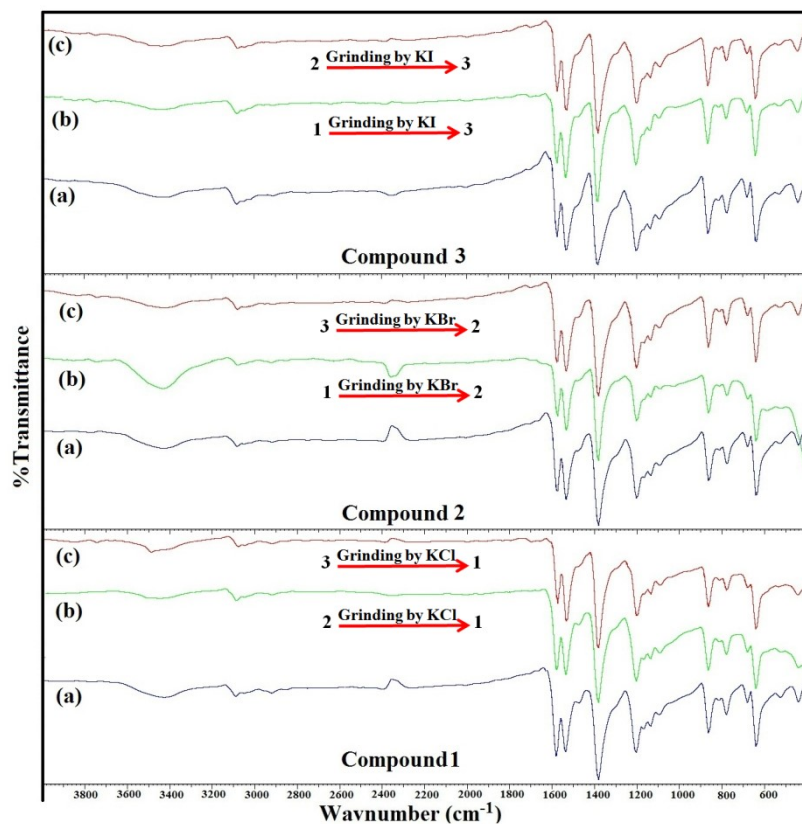

**Figure S6.** IR spectra of **1-3**: a) single crystal, b and c) prepared from mechanochemical solid state transformations.

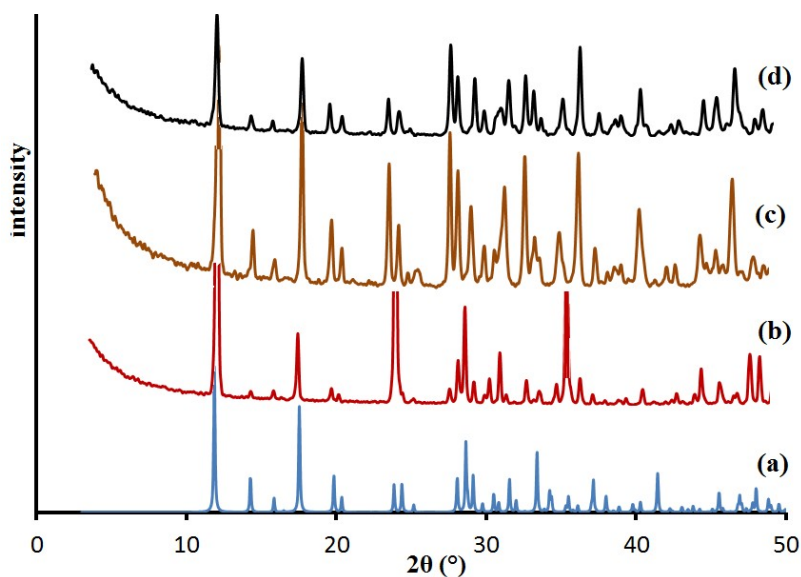

**Figure S7.** The PXRD patterns of **1**: a) simulation; b) experimental; c) ground product of **2** with KCl; d) ground product of **3** with KCl.

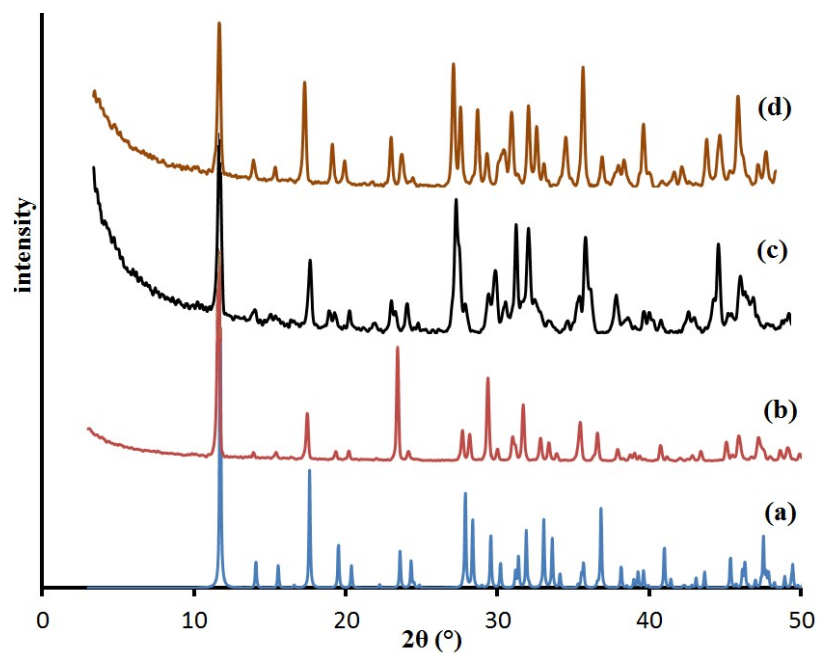

**Figure S8.** The PXRD patterns of **2**: a) simulation; b) experimental; c) ground product of **1** with KBr; d) ground product of **3** with KBr.

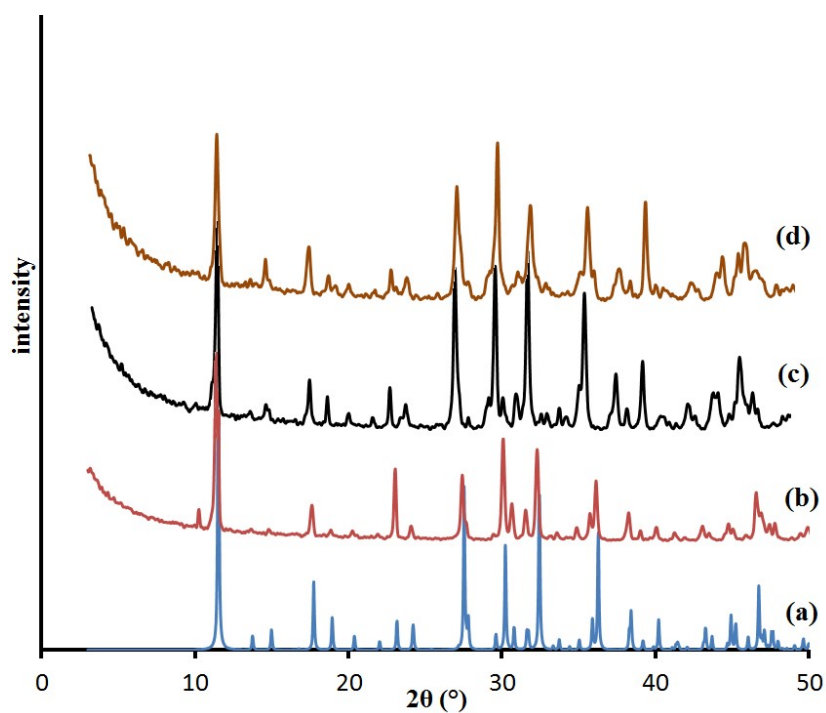

**Figure S9.** The PXRD patterns of **3**: a) simulation; b) experimental; c) ground product of **1** with KI; d) ground product of **2** with KI.



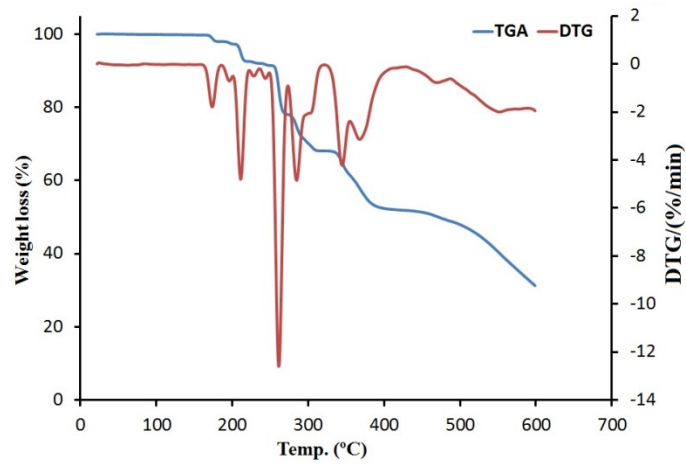

(1)

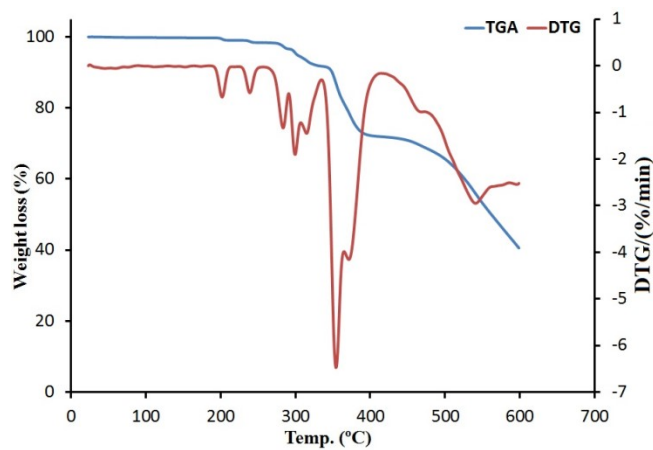

(2)

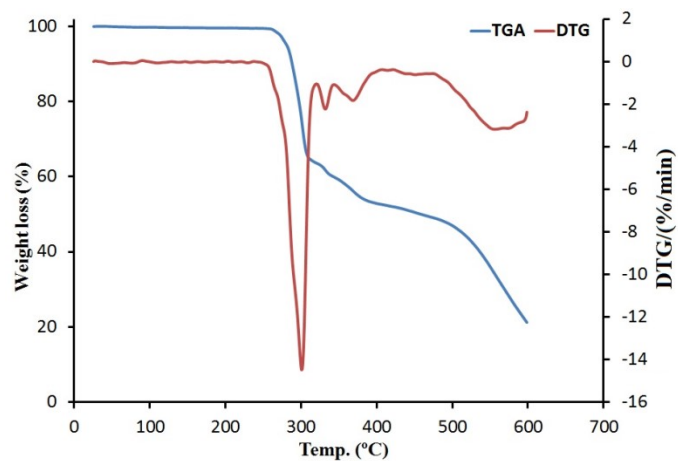

(3)

**Figure S10.** The TGA and DTG curves of 1-3.
